# Supplementary material for: ZEB2 stably represses RAB25 expression through epigenetic regulation by SIRT1 and DNMTs during epithelial-to-mesenchymal transition
Source: PubMed Central journal article supplement (PMC6240308; doi:10.1186/s13072-018-0239-4), 2018-11-16
Supplement: 13072_2018_239_MOESM1_ESM.pdf [file 13072_2018_239_MOESM1_ESM.pdf]

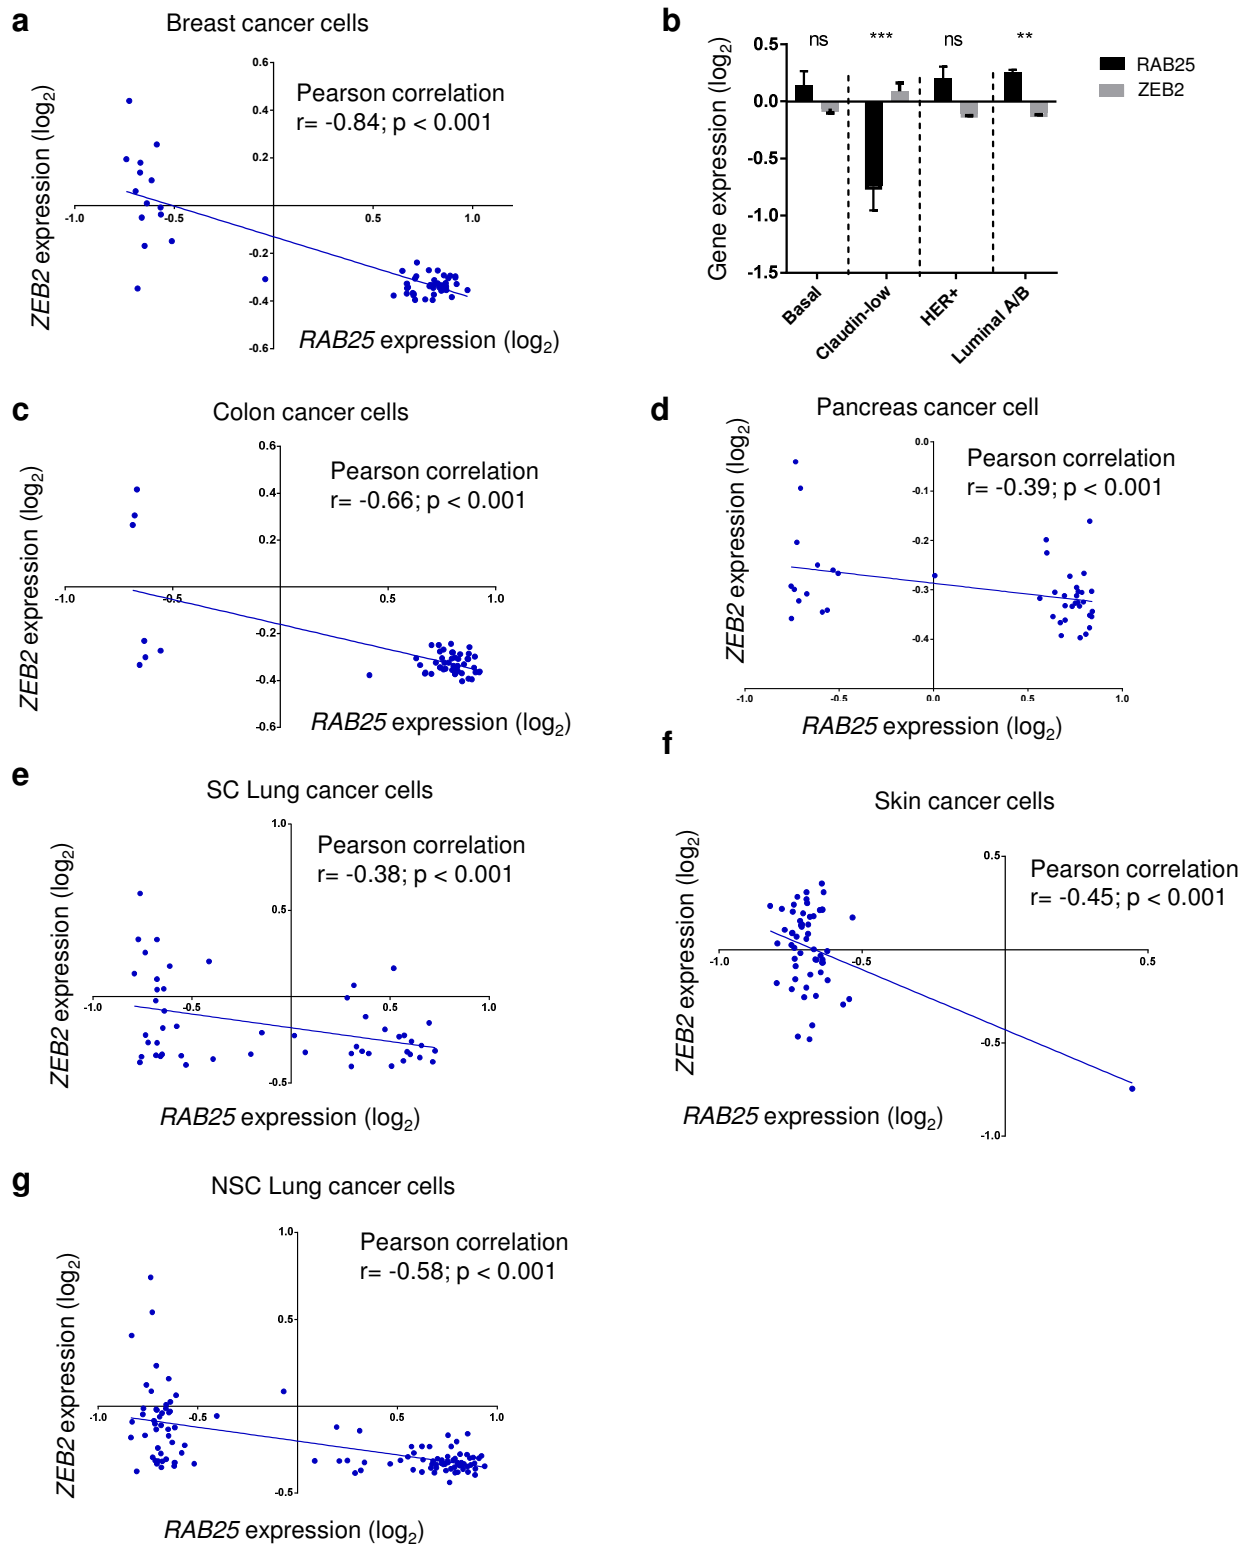

Supplemental Figure 1
