# Supplementary material for: ZEB2 stably represses RAB25 expression through epigenetic regulation by SIRT1 and DNMTs during epithelial-to-mesenchymal transition
Source: PubMed Central journal article supplement (PMC6240308; doi:10.1186/s13072-018-0239-4), 2018-11-16
Supplement: 13072_2018_239_MOESM3_ESM.pdf [file 13072_2018_239_MOESM3_ESM.pdf]

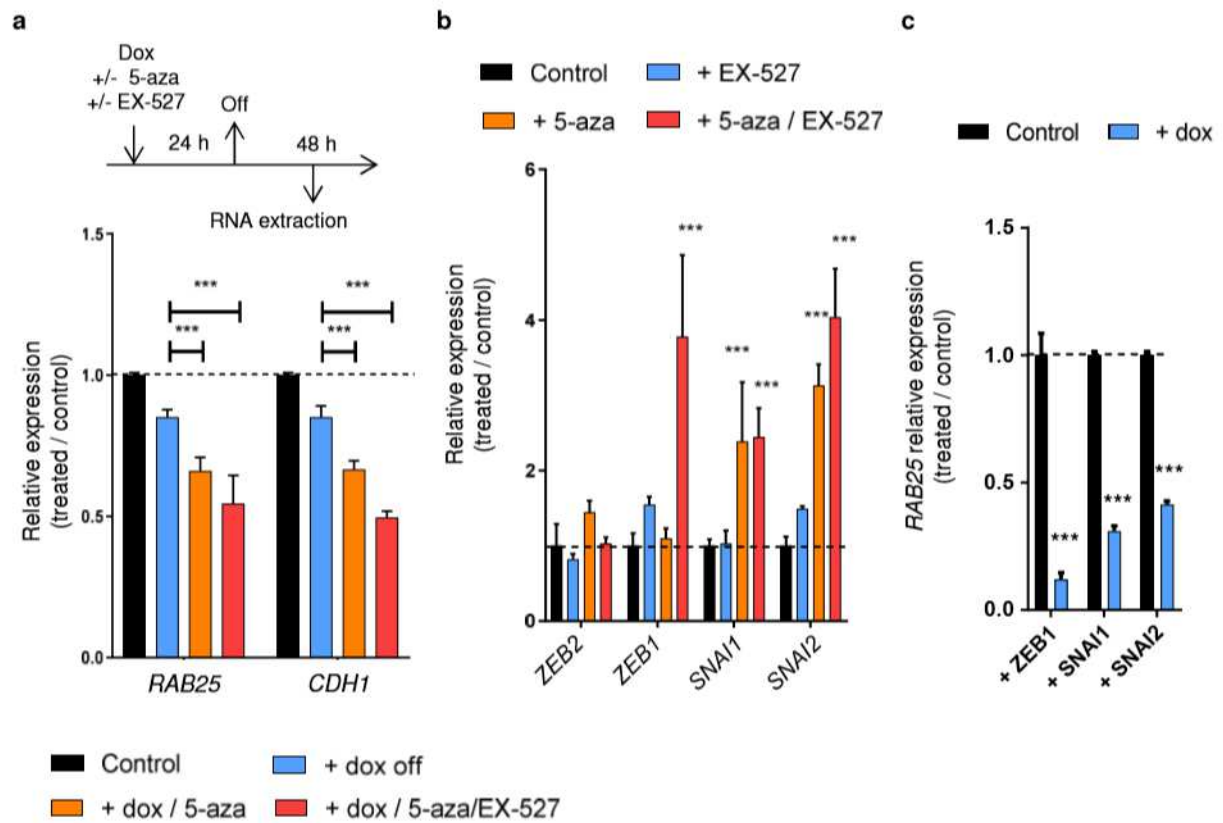

**Supplemental Figure 3. DNMT inhibitor 5-aza-2'-deoxycytidine de-repressed *ZEB1*, *SNAI1* and *SNAI2* EMT-TFs which targeted *RAB25* expression.** (a) *RAB25* and *CDH1* mRNA expression were measured by qRT-PCR 48 hours after doxycycline withdrawal (+ dox off) with 5-aza-2'-deoxycytidine (1 $\mu$ M) (+ dox / 5-aza) and SIRT1 inhibitor (EX-527, 1 $\mu$ M) (+ dox / 5-aza / EX-527). *P*-values were determined using two-way ANOVA (\*\* $p < 0.001$ ). (b) EMT-TFs expression (*ZEB2*, *ZEB1*, *SNAI1* and *SNAI2*) were measured by qRT-PCR 24 hours after 5-aza-2'-deoxycytidine (1 $\mu$ M) (+ 5-aza) and/or SIRT1 inhibitor (EX-527, 1 $\mu$ M) treatments (+ EX-527 and +5-aza / EX-527). *P*-values were determined using two-way ANOVA (\*\* $p < 0.001$ ). (c) *RAB25* mRNA expression was measured by qRT-PCR 48 hours after *ZEB1*, *SNAI1* and *SNAI2* induction (+ dox) in MCF7. *P*-values were determined using t-test (\*\* $p < 0.001$ ).
